# Supplementary figures and images for: Trace analysis of organophosphorus pesticide residues in fruit juices and vegetables by an electrochemically fabricated solid-phase microextraction fiber coated with a layer-by-layer graphenized graphite/graphene oxide/polyaniline nanocomposite
Source: Royal Society of Chemistry journal article supplement (doi:10.1039/d0ay00626b), 2020-01-01

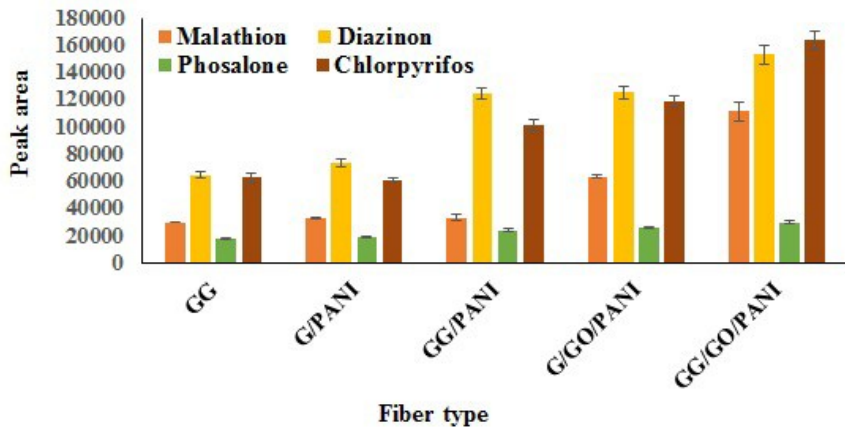

Supplement: d0ay00626b2.pdf [file d0ay00626b2.pdf]
